# Supplementary material for: Enhanced light-emitting transistors utilizing multi-dimensional CsPbBr3 perovskite films and PVP-modified ZTO semiconductor layers
Source: Royal Society of Chemistry journal article supplement (doi:10.1039/d4tc03440f), 2024-01-01

## Supporting Information

### **Enhanced Light-Emitting Transistors Utilizing Multi-Dimensional CsPbBr<sub>3</sub> Perovskite Films and PVP-Modified ZTO Semiconductor Layers**

Xingyu Zhang<sup>1</sup>, Min Guo<sup>1</sup>, Jia Li<sup>1</sup>, Bo Song<sup>1</sup>, Fanwen Meng<sup>1</sup>, Zitong Wang<sup>2</sup>, Zhidong Lou<sup>1</sup>,  
Yanbing Hou<sup>1</sup>, Yufeng Hu<sup>1\*</sup>, and Feng Teng<sup>1\*</sup>

1 Key Laboratory of Luminescence and Optical Information, Ministry of Education,  
Institute of Optoelectronic Technology, Beijing Jiaotong University, Beijing, 100044,  
P.R. China

2 High School Attached to Northeast Normal University, Changchun, 130117, P.R. China  
E-mail: yfhu@bjtu.edu.cn, fteng@bjtu.edu.cn

Key Words: Multi-dimensional perovskite film; Light emitting transistor; CsPbBr<sub>3</sub>;  
PVP modification; Metal oxide semiconductor

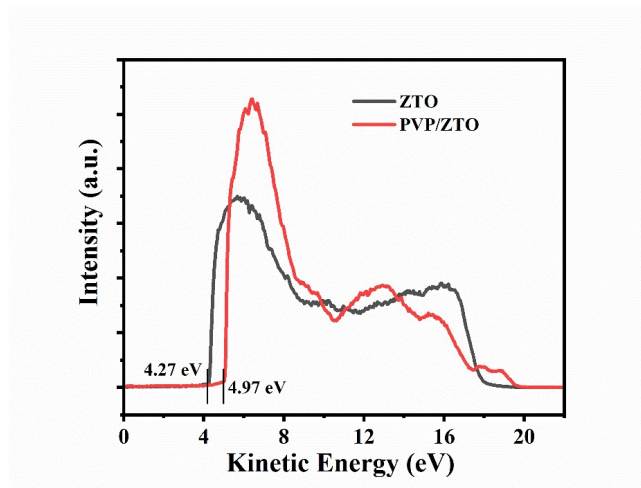

Figure S1 UPS spectrum of ZTO surface before and after PVP modification.

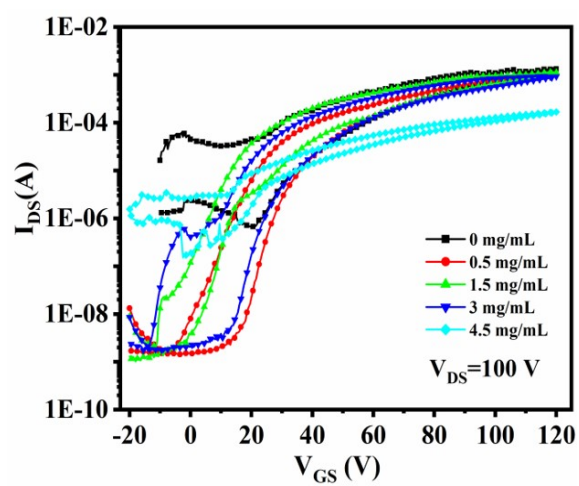

Figure S2 Transfer curves of devices under different PVP concentrations.

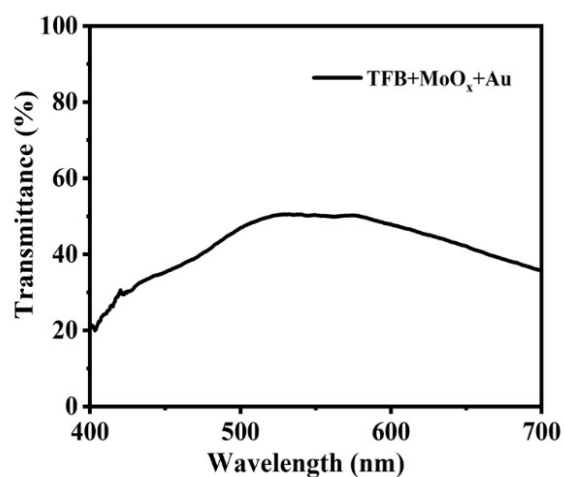

Figure S3 Transmission spectra of TFB, MoO<sub>x</sub> and Au.

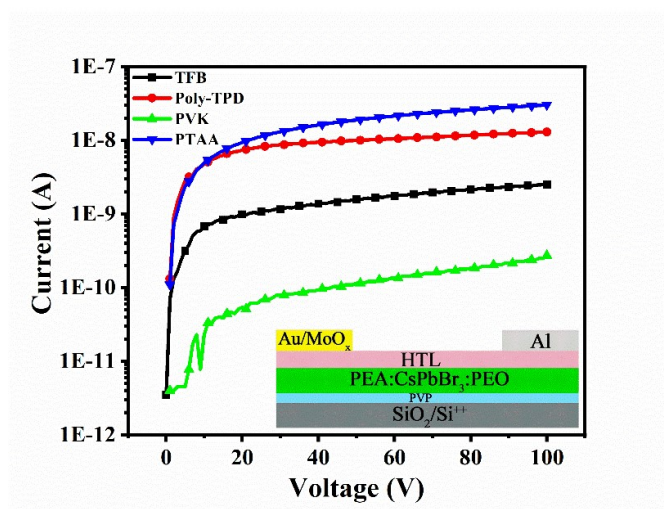

Figure S4 Diode current curve of the device without channel layer.

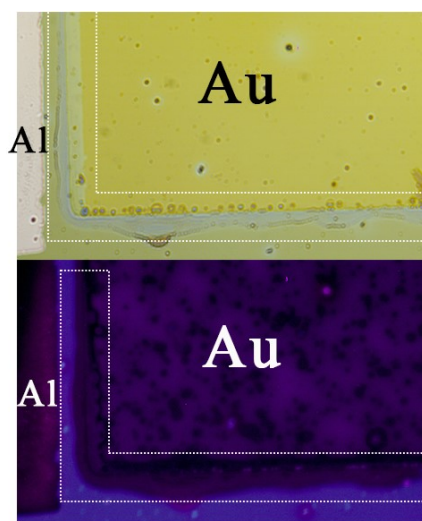

Figure S5 Electrode edge doping after operation of Poly-TPD light-emitting transistor.

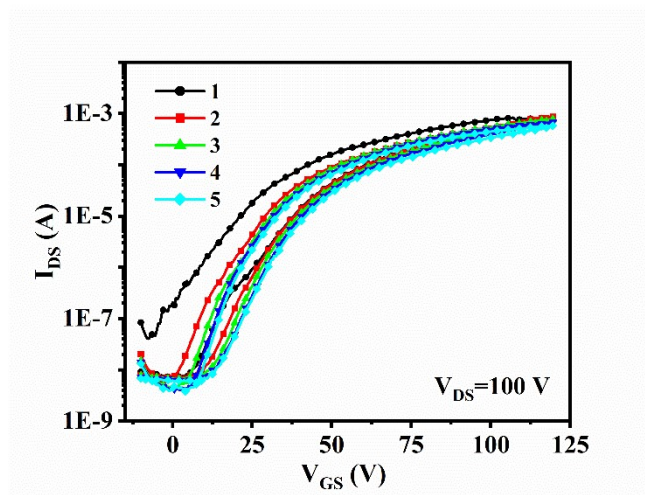

Figure S6 Cyclic scan transfer curve of the device.

Figure S7 Transfer curve and photocurrent curve of the device under different TFB concentrations.

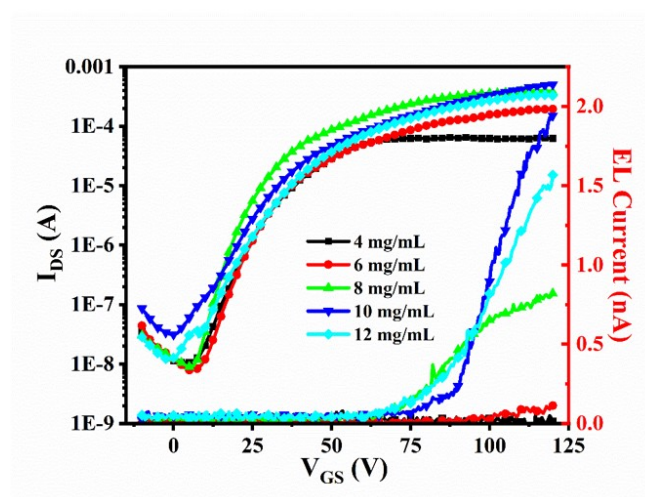

Supplement: d4tc03440f1.pdf [file d4tc03440f1.pdf]
